# Supplementary material
Source: Springer Nature journal article supplement (https://www.springermedizin.de/resource/supplementary/12936_2007_552_MOESM14_ESM.pdf/9548272)

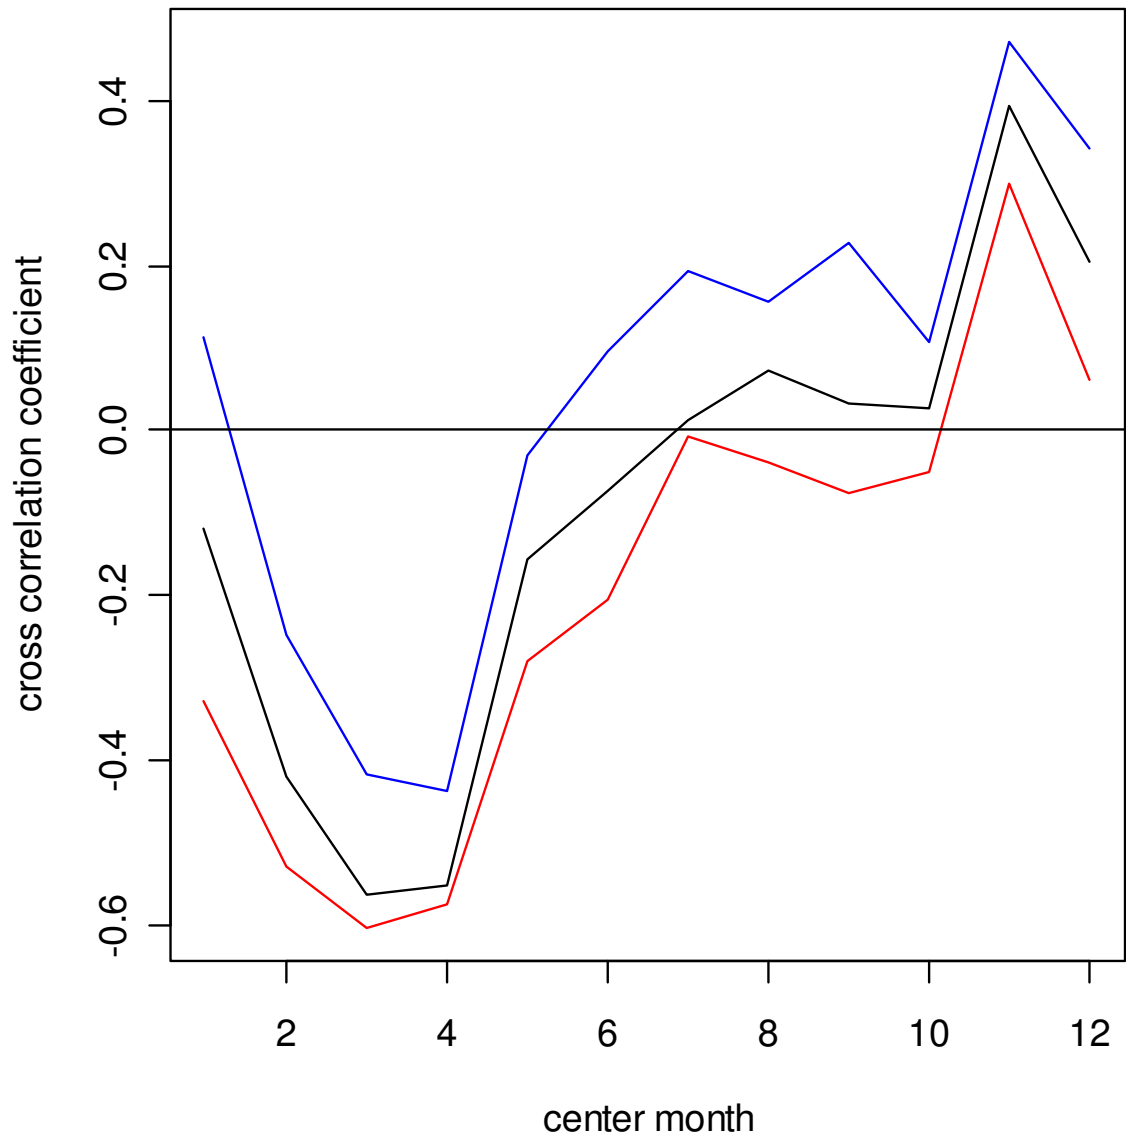

Supplement: MOESM14 [file 9548272]
